# Supplementary material for: Application of the Gross Motor Function Measure-66 (GMFM-66) in Dutch clinical practice: a survey study
Source: PubMed Central journal article supplement (PMC4597756; doi:10.1186/s12887-015-0459-8), 2015-10-07
Supplement: 12887_2015_459_MOESM1_ESM.pdf [file 12887_2015_459_MOESM1_ESM.pdf]

Integration in Fysioroadmap  
Update of GMFM-training

### General impression

Positive

Useful  
Clear  
Nice

### Application

Useful for evaluative purpose

### Content

Disagreement on extent (short versus long)  
Items

Important items missing  
Variable order appreciated  
Order of items illogical  
Too few on activity level

Dimensions useful  
Item set appreciated

Shortening  
Reorganize order of items

### Assessment

Very user friendly  
Difficult in children with mental retardation or behavioral issues  
Liked by children  
Disadvantage of testing without aids/orthoses  
Suitable environment needed  
Limited equipment needed

### Scoring

Disagreement on objectivity / level of interpretability  
Accounts too little for compensating

### GMAE

Valuable  
User friendly  
Useful options (percentiles / graphs / item maps)

### Interpretation

Limited perceived sensitivity to change  
In general  
Young children  
Severely affected children  
Slightly affected children (ceiling effect)  
Valuable for clinical practice (treatment plan)  
Comparable with clinical presentation  
Understandable for parents  
Videotaping useful

### Instruction DVD

More clear  
Examples of how to score performances  
Space for comments behind each item score

More specific description of scoring descriptions  
Dutch GMFM-66 manual

### Missing options

Description of score-description per item  
Extension from motor growth curves  
More page-efficient printing options

Reference tables  
More responsive for severely affected children

General opinion

Suggestion
